# Supplementary material
Source: Springer Nature journal article supplement (https://www.springermedizin.de/resource/supplementary/12889_2014_7414_MOESM3_ESM.pdf/9497192)
Supplement: MOESM3 [file 9497192]

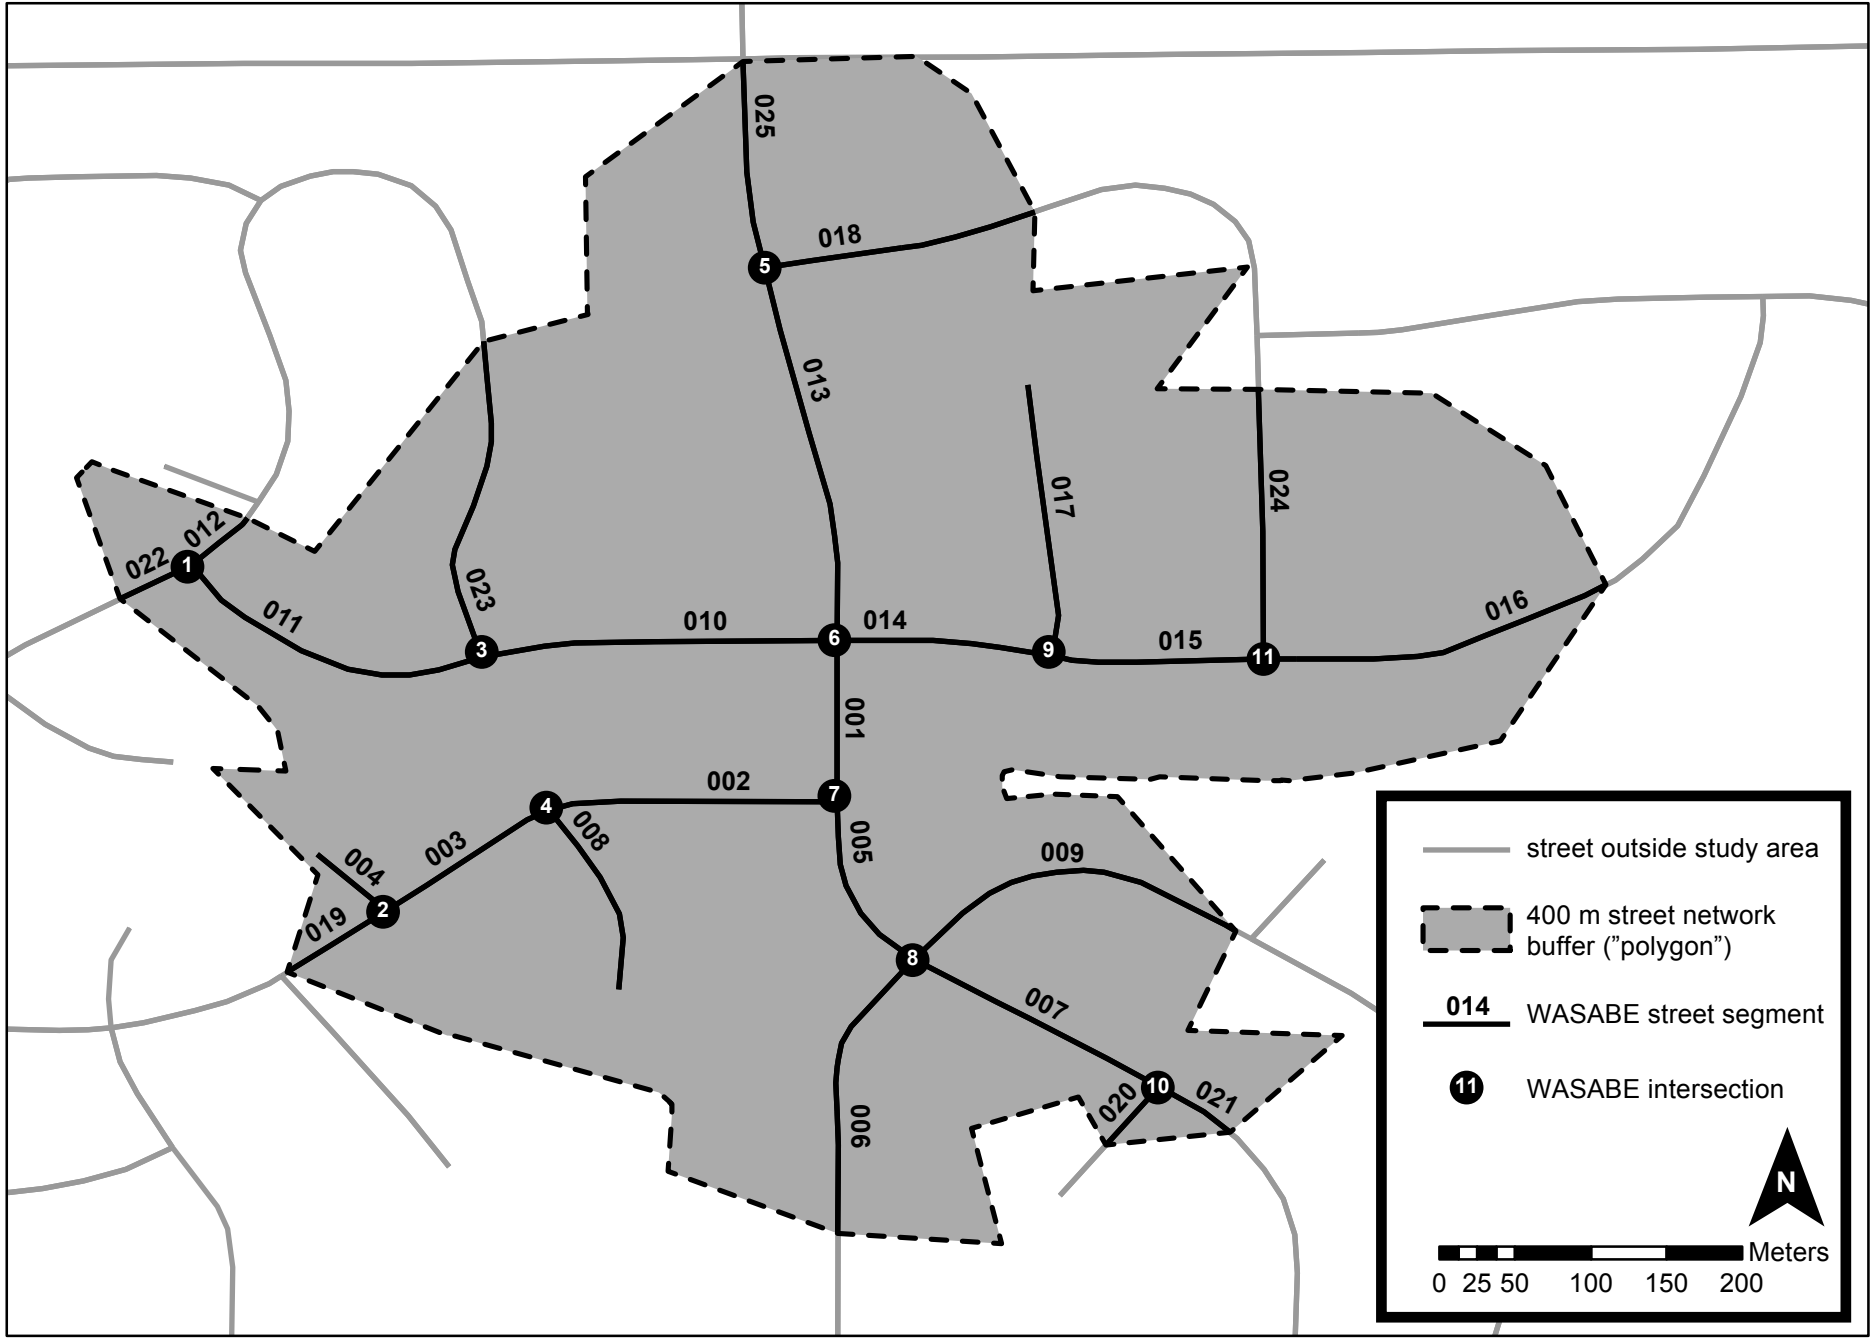

— street outside study area

- - - 400 m street network buffer ("polygon")

**014** WASABE street segment

**11** WASABE intersection

Meters

0 25 50 100 150 200
